# Supplementary material for: InsuOnline, an Electronic Game for Medical Education on Insulin Therapy: A Randomized Controlled Trial With Primary Care Physicians
Source: PubMed Central journal article supplement (PMC5364323; doi:10.2196/jmir.6944), 2017-03-09
Supplement: jmir_v19i3e72_app2.pdf [file jmir_v19i3e72_app2.pdf]

Diehl LA et al. InsuOnline, an electronic game for medical education on insulin therapy: a randomized controlled trial with primary care physicians.

## APPENDIX 2

### INSTRUMENTS (QUESTIONNAIRES) USED IN THIS STUDY

#### APPENDIX 2.1

#### QUESTIONS ON SUBJECTS' DEMOGRAPHIC AND PROFESSIONAL DATA

|                                                                                                   |                                                                  |
|---------------------------------------------------------------------------------------------------|------------------------------------------------------------------|
| 1. Number of license at the Regional Medical Council                                              | (Free text)                                                      |
| 2. Gender                                                                                         | <input type="checkbox"/> Male<br><input type="checkbox"/> Female |
| 3. Age                                                                                            | (Free text)                                                      |
| 4. How many patients with type 2 diabetes do you use to see per month (approximately)?            | (Free text)                                                      |
| 5. How many patients with type 2 diabetes on insulin do you use to see per month (approximately)? | (Free text)                                                      |
| 6. How many patients with type 1 diabetes do you use to see per month (approximately)?            | (Free text)                                                      |
| 7. How many years do you have since your graduation in medical school?                            | (Free text)                                                      |
| 8. How many years do you have of experience in primary health care?                               | (Free text)                                                      |
| 9. Did you do medical residency?                                                                  | <input type="checkbox"/> Yes<br><input type="checkbox"/> No      |
| 10. If you did residency, in what area?                                                           | (Free text)                                                      |

APPENDIX 2.2

COMPETENCE SUBSCALE

| <b>Insulin-related problem-solving skills</b>                                                                                                                                                                                                                                                                                                                                                                                                                                                                     | <b>(11 multiple-choice questions)</b>                                                                                                                                                                                                                                                                                                                                                         |
|-------------------------------------------------------------------------------------------------------------------------------------------------------------------------------------------------------------------------------------------------------------------------------------------------------------------------------------------------------------------------------------------------------------------------------------------------------------------------------------------------------------------|-----------------------------------------------------------------------------------------------------------------------------------------------------------------------------------------------------------------------------------------------------------------------------------------------------------------------------------------------------------------------------------------------|
| <b>Text of the question</b>                                                                                                                                                                                                                                                                                                                                                                                                                                                                                       | <b>Choices</b>                                                                                                                                                                                                                                                                                                                                                                                |
| 1. A 55 years-old patient has type 2 DM for 8 years now. He is usually in good control, but in the last 6 months he has been showing worsening of his glycemic control (last A1c: 8.5%, fasting plasma glucose: 200mg/dL) and weight loss, despite continuous use of 2 oral drugs in maximal doses (metformin and glyburide). He denies any dietary or alcohol abuse, use of other medications, or infections. The best option to improve his glycemic control at this point would be:                            | <input type="checkbox"/> Start NPH insulin at bedtime, 10 units, and maintain both oral drugs <sup>a</sup><br><input type="checkbox"/> Start NPH insulin 0.2 units/kg at breakfast, and maintain both oral drugs<br><input type="checkbox"/> Start NPH insulin 0.5 units/kg at bedtime, maintain metformin, and stop glyburide<br><input type="checkbox"/> Add a third oral antidiabetic drug |
| 2. A 50 years-old patient with 70kg has type 2 diabetes diagnosed 10 years ago. He currently takes metformin 850mg tid, and insulin in the following regimen: - At breakfast: 30 units of NPH + 8 units of regular; - Before supper: 10 units of NPH + 8 units of regular. The patient reports recurrent hypoglycemias in the middle of the night (about 3 AM) and moderately high levels of fasting plasma glucose. In other times of the day, his glucose levels are OK. The best option in this case would be: | <input type="checkbox"/> Stop metformin<br><input type="checkbox"/> Reduce supper NPH insulin by half<br><input type="checkbox"/> Stop supper NPH insulin<br><input type="checkbox"/> Delay nighttime NPH insulin for application at bedtime <sup>a</sup>                                                                                                                                     |
| 3. A 60 years-old patient with 80kg has type 2 diabetes for more than 15 years now. He is currently in use of maximal-dose metformin,                                                                                                                                                                                                                                                                                                                                                                             | <input type="checkbox"/> Maintain current medications and add NPH insulin, 10 units before lunch                                                                                                                                                                                                                                                                                              |

|                                                                                                                                                                                                                                                                                                                                                                                                                                                                                                                                                                                             |                                                                                                                                                                                                                                                                                                                                                                    |
|---------------------------------------------------------------------------------------------------------------------------------------------------------------------------------------------------------------------------------------------------------------------------------------------------------------------------------------------------------------------------------------------------------------------------------------------------------------------------------------------------------------------------------------------------------------------------------------------|--------------------------------------------------------------------------------------------------------------------------------------------------------------------------------------------------------------------------------------------------------------------------------------------------------------------------------------------------------------------|
| <p>plus NPH insulin: 20 units at breakfast, and 12 units at bedtime. His plasma glucose levels throughout the day, with the exception of after supper, when his glycemia is persistently between 200 and 300mg/dL. He denies hypoglycemias. The best option to optimize his glycemic control would be:</p>                                                                                                                                                                                                                                                                                  | <p><input type="checkbox"/> Maintain breakfast NPH, and change nighttime NPH from bedtime to before supper</p> <p><input type="checkbox"/> Increase breakfast NPH dose, and maintain bedtime NPH</p> <p><input type="checkbox"/> Maintain current medications and add regular insulin, 4 units before supper <sup>a</sup></p>                                      |
| <p>4. A 40 years-old previously healthy patient seeks for medical evaluation complaining of marked tiredness, being thirsty and visual turvation in the last 3 weeks. He has lost 5kg during that period, despite eating even more than usual. He does not take any medication. Lab tests show fasting plasma glucose: 230mg/dL, and A1c: 10%. Indicate the best initial treatment for this patient:</p>                                                                                                                                                                                    | <p><input type="checkbox"/> Lifestyle changes only</p> <p><input type="checkbox"/> Metformin</p> <p><input type="checkbox"/> Metformin + glyburide</p> <p><input type="checkbox"/> Insulin <sup>a</sup></p>                                                                                                                                                        |
| <p>5. A 45 years-old 100-kg patient has type 2 diabetes for ten years now. He has initiated NPH insulin 20 units at bedtime two months ago, because he was unable to maintain a good glycemic control with oral drugs only (metformin and glyburide in maximal doses). He comes today with new exams: fasting plasma glucose = 180mg/dL, and A1c = 8%. His self-monitoring of capillary blood glucose also shows several readings from 120 to 200mg/dL before breakfast, in the last 60 days. He did not have any hypoglycemias, and has good adherence. The best option to improve his</p> | <p><input type="checkbox"/> Change the time of the NPH injection, from bedtime to breakfast</p> <p><input type="checkbox"/> Add a second injection of NPH before breakfast</p> <p><input type="checkbox"/> Increase the dose of bedtime NPH insulin <sup>a</sup></p> <p><input type="checkbox"/> Stop all oral drugs and initiate an intensive insulin regimen</p> |

|                                                                                                                                                                                                                                                                                                                                                                                                                                                                                                                                                                                                                                                                                                  |                                                                                                                                                                                                                                                                                                                                                                                                                                                                                           |
|--------------------------------------------------------------------------------------------------------------------------------------------------------------------------------------------------------------------------------------------------------------------------------------------------------------------------------------------------------------------------------------------------------------------------------------------------------------------------------------------------------------------------------------------------------------------------------------------------------------------------------------------------------------------------------------------------|-------------------------------------------------------------------------------------------------------------------------------------------------------------------------------------------------------------------------------------------------------------------------------------------------------------------------------------------------------------------------------------------------------------------------------------------------------------------------------------------|
| glycemic control, at this point, would be:                                                                                                                                                                                                                                                                                                                                                                                                                                                                                                                                                                                                                                                       |                                                                                                                                                                                                                                                                                                                                                                                                                                                                                           |
| <p>6. A 15 years-old teenager seeks medical attention because she has been having excessive thirst and polyuria in the last 3 weeks, that worsened in the last 3 days, when she also started feeling ill, with abdominal pain and vomits. She lost 4kg during that period, despite normal appetite. During examination, she is prostrated, moderately dehydrated, afebrile, tachycardic (110bpm), tachypneic, and hypotensive (90/50mmHg). Her capillary glucose at that moment was 432mg/dL. The most adequate immediate action is:</p>                                                                                                                                                         | <p><input type="checkbox"/> Start hydration with IV saline and collect blood for lab tests (gasometry, electrolytes, ketones) <sup>a</sup></p> <p><input type="checkbox"/> Start hydration with IV saline and give IM regular insulin 15 units</p> <p><input type="checkbox"/> Start hydration with IV Ringer lactate and start IV infusion of regular insulin 6 units/hour</p> <p><input type="checkbox"/> Give SC regular insulin 6 units and IV sodium bicarbonate 50mEq in 1 hour</p> |
| <p>7. A 25 years-old patient with 60kg has type 1 diabetes diagnosed 15 years ago, and currently takes insulin as follows: - Before breakfast: 16 units of NPH + 8 units of regular; - Before lunch: 6 units of regular; - Before dinner: 8 units of regular; - At bedtime: 14 units of NPH. His last A1c was 7.4%. His weight is stable, he has no hypoglycemias, and his dietary habits are very regular. His self-monitored blood glucose levels are as follows: - Fasting: from 90 to 140; - Before lunch: from 80 to 130; - 2 hours post-lunch: from 140 to 190; - Before dinner: from 70 to 120; - Bedtime: from 180 to 250. The best choice to improve his glycemic control would be:</p> | <p><input type="checkbox"/> Increase breakfast NPH to 20 units</p> <p><input type="checkbox"/> Increase lunch regular to 10 units</p> <p><input type="checkbox"/> Increase dinner regular to 12 units <sup>a</sup></p> <p><input type="checkbox"/> Increase dinner regular to 16 units</p>                                                                                                                                                                                                |
| <p>8. A lean previously healthy 20 years-old male was diagnosed with diabetes today in a</p>                                                                                                                                                                                                                                                                                                                                                                                                                                                                                                                                                                                                     | <p><input type="checkbox"/> Start metformin e glyburide and follow-up at primary health care</p>                                                                                                                                                                                                                                                                                                                                                                                          |

|                                                                                                                                                                                                                                                                                                                                                                                                                                               |                                                                                                                                                                                                                                                                                                                                                                                                                                                  |
|-----------------------------------------------------------------------------------------------------------------------------------------------------------------------------------------------------------------------------------------------------------------------------------------------------------------------------------------------------------------------------------------------------------------------------------------------|--------------------------------------------------------------------------------------------------------------------------------------------------------------------------------------------------------------------------------------------------------------------------------------------------------------------------------------------------------------------------------------------------------------------------------------------------|
| <p>primary health care facility, due to suggestive clinical symptoms and a fasting plasma glucose = 320mg/dL). He has a healthy appearance, is well hydrated, orientated, afebrile, normotensive, and breathing with no difficulties, with only a mild ketonuria. He does not take any medication and does not have other people with diabetes in his family. Choose the best immediate treatment:</p>                                        | <p>level</p> <p><input type="checkbox"/> Start NPH insulin once daily at bedtime and follow-up at primary health care level</p> <p><input type="checkbox"/> Start NPH insulin once daily at bedtime and referral to endocrinologist</p> <p><input type="checkbox"/> Start insulin in an intensive regimen and referral to endocrinologist <sup>a</sup></p>                                                                                       |
| <p>9. A 90-kg patient with type 2 diabetes needs intensification of his antidiabetic therapy because he is very symptomatic and still presents very high glucose levels during all times of the day, with A1c &gt;9.5% despite taking 2 oral drugs + bedtime NPH insulin. The most practical way to start an intensive insulin regimen using only insulins available in primary care, with an initial dose of 0.5 units/kg/day, would be:</p> | <p><input type="checkbox"/> NPH 15 units at breakfast, lunch, and dinner</p> <p><input type="checkbox"/> NPH 10 units + regular 5 units at breakfast, lunch, and dinner</p> <p><input type="checkbox"/> NPH 20 units + regular 10 units at breakfast; NPH 10 units + regular 5 units at dinner <sup>a</sup></p> <p><input type="checkbox"/> NPH 10 units + regular 10 units at breakfast; regular 10 units at lunch; NPH 15 units at bedtime</p> |
| <p>10. A 40 years-old patient with type 2 diabetes for 12 years now is currently on a mix of NPH + regular insulin twice a day (at breakfast and at dinner) plus metformin. She enrolled at a gym for trying to lose weight and will start to do aerobic exercises of moderate intensity, 45 to 60 minutes per session, just after breakfast. The most adequate adjustment in her insulin therapy for this situation is:</p>                  | <p><input type="checkbox"/> Reduce by 20% to 50% her breakfast regular insulin, in the days she will exercise <sup>a</sup></p> <p><input type="checkbox"/> Withhold her breakfast regular insulin, in the days she will exercise</p> <p><input type="checkbox"/> Reduce by 25% her nighttime NPH insulin, in the nights before exercise</p> <p><input type="checkbox"/> Increase her ingestion of simple carbohydrates during breakfast, in</p>  |

|                                                                                                                                                                                                                                                                                                                                                                                                                                           |                                                                                                                                                                                                                                                                                                                   |
|-------------------------------------------------------------------------------------------------------------------------------------------------------------------------------------------------------------------------------------------------------------------------------------------------------------------------------------------------------------------------------------------------------------------------------------------|-------------------------------------------------------------------------------------------------------------------------------------------------------------------------------------------------------------------------------------------------------------------------------------------------------------------|
|                                                                                                                                                                                                                                                                                                                                                                                                                                           | the days she will exercise                                                                                                                                                                                                                                                                                        |
| 11. A 48 years-old patient has 8 years of diabetes and is currently taking NPH 20 units at bedtime, metformin and gliclazide in maximal doses. Her latter lab tests show fasting plasma glucose: 102mg/dL, and A1c: 7.6%. Her fasting glucose measurements are all between 80 and 120mg/dL. Her weight is stable and she does not complain of hypoglycemias. At this time, the next step to try to improve her glycemic control would be: | <input type="checkbox"/> Increase bedtime NPH to 24 units<br><input type="checkbox"/> Add a second injection of NPH, 10 units before breakfast<br><input type="checkbox"/> Add glyburide<br><input type="checkbox"/> Request monitoring of capillary blood glucose in different times during the day <sup>a</sup> |
|                                                                                                                                                                                                                                                                                                                                                                                                                                           |                                                                                                                                                                                                                                                                                                                   |
| <b>Insulin-related factual knowledge</b>                                                                                                                                                                                                                                                                                                                                                                                                  | <b>(9 multiple-choice questions)</b>                                                                                                                                                                                                                                                                              |
|                                                                                                                                                                                                                                                                                                                                                                                                                                           |                                                                                                                                                                                                                                                                                                                   |
| <b>Text of the question</b>                                                                                                                                                                                                                                                                                                                                                                                                               | <b>Choices</b>                                                                                                                                                                                                                                                                                                    |
| 12. Which of the following insulins has a cloudy ("milky") appearance?                                                                                                                                                                                                                                                                                                                                                                    | <input type="checkbox"/> Regular<br><input type="checkbox"/> NPH <sup>a</sup><br><input type="checkbox"/> Glargin<br><input type="checkbox"/> All of them                                                                                                                                                         |
| 13. NPH insulin, when injected in the subcutaneous tissue, presents PEAK and DURATION of action, respectively, in:                                                                                                                                                                                                                                                                                                                        | <input type="checkbox"/> 2 to 3 hours, and from 5 to 8 hours<br><input type="checkbox"/> 3 to 4 hours, and from 8 to 12 hours<br><input type="checkbox"/> 6 to 10 hours, and from 12 to 16 hours <sup>a</sup><br><input type="checkbox"/> 6 to 10 hours, and from 14 to 24 hours                                  |
| 14. Regarding insulin storing, preparation and injection techniques, all the following affirmations are correct, EXCEPT:                                                                                                                                                                                                                                                                                                                  | <input type="checkbox"/> NPH insulin must be rotated between hands 10 to 20 times before injection                                                                                                                                                                                                                |

|                                                                                                                                                                                                                                                                                                                              |                                                                                                                                                                                                                                                                                                                                                                                                                                                                                                                                                                                                |
|------------------------------------------------------------------------------------------------------------------------------------------------------------------------------------------------------------------------------------------------------------------------------------------------------------------------------|------------------------------------------------------------------------------------------------------------------------------------------------------------------------------------------------------------------------------------------------------------------------------------------------------------------------------------------------------------------------------------------------------------------------------------------------------------------------------------------------------------------------------------------------------------------------------------------------|
|                                                                                                                                                                                                                                                                                                                              | <input type="checkbox"/> Open insulin vials must be stored in the refrigerator exclusively <sup>a</sup><br><input type="checkbox"/> Insulin pen devices are easier to use for injection than syringes<br><input type="checkbox"/> Shortest needles must be used for injection, even in obese patients                                                                                                                                                                                                                                                                                          |
| <p>15. The glycemic goals for adults with diabetes, according with American Diabetes Association, are:</p>                                                                                                                                                                                                                   | <input type="checkbox"/> fasting plasma glucose: 70 to 130; preprandial plasma glucose: 70 to 130; postprandial plasma glucose: under 180 <sup>a</sup><br><input type="checkbox"/> fasting plasma glucose: 70 to 100; preprandial plasma glucose: 100 to 140; postprandial plasma glucose: under 160<br><input type="checkbox"/> fasting plasma glucose: under 100; preprandial plasma glucose: under 110; postprandial plasma glucose: under 140<br><input type="checkbox"/> fasting plasma glucose: under 126; preprandial plasma glucose: under 140; postprandial plasma glucose: under 200 |
| <p>16. Type 2 diabetes is a progressive disease, in which patients continue to progressive lose their endogenous insulin secretion, until they eventually need exogenous insulin reposition to be able to obtain and maintain a good glycemic control. The percentage of patients with type 2 diabetes that will require</p> | <input type="checkbox"/> 2% to 10%<br><input type="checkbox"/> 10% to 25%<br><input type="checkbox"/> 25% to 40%<br><input type="checkbox"/> 40% to 80% <sup>a</sup>                                                                                                                                                                                                                                                                                                                                                                                                                           |

|                                                                                                                                                                                   |                                                                                                                                                                                                                                                                                                                                                                                                                                        |
|-----------------------------------------------------------------------------------------------------------------------------------------------------------------------------------|----------------------------------------------------------------------------------------------------------------------------------------------------------------------------------------------------------------------------------------------------------------------------------------------------------------------------------------------------------------------------------------------------------------------------------------|
| exogenous insulin, after several years of disease, is estimated to be:                                                                                                            |                                                                                                                                                                                                                                                                                                                                                                                                                                        |
| 17. All the following are signs of severe insulin deficiency:                                                                                                                     | <input type="checkbox"/> Involuntary weight loss, visual disturbances, gross glycosuria, hyperkalemia<br><input type="checkbox"/> Involuntary weight loss, marked polyuria/polydipsia, plasma glucose >300, ketosis <sup>a</sup><br><input type="checkbox"/> Plasma glucose >250, pH <7,3, triglycerides >250, acanthosis nigricans<br><input type="checkbox"/> Increased abdominal waist, high blood pressure, HDL <45, hyperuricemia |
| 18. Please indicate which from the alternatives presents a correct choice of food for initial treatment of an episode of mild hypoglycemia:                                       | <input type="checkbox"/> A chocolate bar<br><input type="checkbox"/> A big glass of sugared milk<br><input type="checkbox"/> A can of diet soda<br><input type="checkbox"/> Half a can of regular soda <sup>a</sup>                                                                                                                                                                                                                    |
| 19. Most common adverse effects of insulin therapy are:                                                                                                                           | <input type="checkbox"/> Allergy and worsening of diabetic neuropathy<br><input type="checkbox"/> Weight gain and hypoglycemia <sup>a</sup><br><input type="checkbox"/> Lipoatrophy and hypokalemia<br><input type="checkbox"/> Lipohypertrophy and increase of cardiovascular risk                                                                                                                                                    |
| 20. The individualisation of glycemic goals in diabetes treatment is a current trend. Higher A1c goals (up to 8% or 8.5%) are preferable in all the following situations, EXCEPT: | <input type="checkbox"/> Recent onset of diabetes <sup>a</sup><br><input type="checkbox"/> Fragile elderly patients<br><input type="checkbox"/> Severe comorbidities with short life expectancy<br><input type="checkbox"/> Severe kidney dysfunction                                                                                                                                                                                  |

<sup>a</sup> Correct answer.



### APPENDIX 2.3

#### ATTITUDES SUBSCALE

| <b>Text of the question</b>                                                                                                                       | <b>Choices</b>                                                                                                                                                                                                           |
|---------------------------------------------------------------------------------------------------------------------------------------------------|--------------------------------------------------------------------------------------------------------------------------------------------------------------------------------------------------------------------------|
|                                                                                                                                                   |                                                                                                                                                                                                                          |
| I think it is best to delay insulin initiation until it is absolutely essential (after trying combination of several oral drugs in maximal doses) | <input type="checkbox"/> Strongly agree<br><input type="checkbox"/> Partially agree<br><input type="checkbox"/> Indifferent<br><input type="checkbox"/> Partially disagree<br><input type="checkbox"/> Strongly disagree |
| I think insulin therapy should be initiated by an endocrinologist, and not by a primary care physician                                            | <input type="checkbox"/> Strongly agree<br><input type="checkbox"/> Partially agree<br><input type="checkbox"/> Indifferent<br><input type="checkbox"/> Partially disagree<br><input type="checkbox"/> Strongly disagree |
| I think insulin should be initiated into the hospital                                                                                             | <input type="checkbox"/> Strongly agree<br><input type="checkbox"/> Partially agree<br><input type="checkbox"/> Indifferent<br><input type="checkbox"/> Partially disagree<br><input type="checkbox"/> Strongly disagree |
| I think family physicians would prescribe insulin more often if it were not injectable                                                            | <input type="checkbox"/> Strongly agree<br><input type="checkbox"/> Partially agree<br><input type="checkbox"/> Indifferent<br><input type="checkbox"/> Partially disagree<br><input type="checkbox"/> Strongly disagree |
| I think insulin initiation is one of the most difficult aspects of treating patients with DM                                                      | <input type="checkbox"/> Strongly agree<br><input type="checkbox"/> Partially agree<br><input type="checkbox"/> Indifferent<br><input type="checkbox"/> Partially disagree<br><input type="checkbox"/> Strongly disagree |
| I think most patients with type 2 DM will eventually need insulin, regardless of their adherence to treatment                                     | <input type="checkbox"/> Strongly agree<br><input type="checkbox"/> Partially agree<br><input type="checkbox"/> Indifferent<br><input type="checkbox"/> Partially disagree<br><input type="checkbox"/> Strongly disagree |
| I think that, for most patients, benefits of insulin therapy are greater than the risks                                                           | <input type="checkbox"/> Strongly agree<br><input type="checkbox"/> Partially agree<br><input type="checkbox"/> Indifferent<br><input type="checkbox"/> Partially disagree<br><input type="checkbox"/> Strongly disagree |
| I think that most patients would benefit from insulin therapy                                                                                     | <input type="checkbox"/> Strongly agree                                                                                                                                                                                  |

|                                                                                |                                                                                                                                                                                                                          |
|--------------------------------------------------------------------------------|--------------------------------------------------------------------------------------------------------------------------------------------------------------------------------------------------------------------------|
| before developing diabetes complications                                       | <input type="checkbox"/> Partially agree<br><input type="checkbox"/> Indifferent<br><input type="checkbox"/> Partially disagree<br><input type="checkbox"/> Strongly disagree                                            |
| I think that, for most patients, training for using insulin is not complicated | <input type="checkbox"/> Strongly agree<br><input type="checkbox"/> Partially agree<br><input type="checkbox"/> Indifferent<br><input type="checkbox"/> Partially disagree<br><input type="checkbox"/> Strongly disagree |

APPENDIX 2.4

GAME EVALUATION SUBSCALE

| <b>Text of the question</b>                                                            | <b>Choices</b>                                                                                                                                                                                                           |
|----------------------------------------------------------------------------------------|--------------------------------------------------------------------------------------------------------------------------------------------------------------------------------------------------------------------------|
|                                                                                        |                                                                                                                                                                                                                          |
| The game is fun to play                                                                | <input type="checkbox"/> Strongly agree<br><input type="checkbox"/> Partially agree<br><input type="checkbox"/> Indifferent<br><input type="checkbox"/> Partially disagree<br><input type="checkbox"/> Strongly disagree |
| The game captured my attention all the time                                            | <input type="checkbox"/> Strongly agree<br><input type="checkbox"/> Partially agree<br><input type="checkbox"/> Indifferent<br><input type="checkbox"/> Partially disagree<br><input type="checkbox"/> Strongly disagree |
| I would like to try other similar games in the future                                  | <input type="checkbox"/> Strongly agree<br><input type="checkbox"/> Partially agree<br><input type="checkbox"/> Indifferent<br><input type="checkbox"/> Partially disagree<br><input type="checkbox"/> Strongly disagree |
| Depth of topics presented in the game was appropriate                                  | <input type="checkbox"/> Strongly agree<br><input type="checkbox"/> Partially agree<br><input type="checkbox"/> Indifferent<br><input type="checkbox"/> Partially disagree<br><input type="checkbox"/> Strongly disagree |
| Patients presented in the game were similar with the ones I usually see in my practice | <input type="checkbox"/> Strongly agree<br><input type="checkbox"/> Partially agree<br><input type="checkbox"/> Indifferent<br><input type="checkbox"/> Partially disagree<br><input type="checkbox"/> Strongly disagree |
| The game increased my knowledge about diabetes                                         | <input type="checkbox"/> Strongly agree<br><input type="checkbox"/> Partially agree<br><input type="checkbox"/> Indifferent<br><input type="checkbox"/> Partially disagree<br><input type="checkbox"/> Strongly disagree |
| The game will influence the way I treat patients with diabetes                         | <input type="checkbox"/> Strongly agree<br><input type="checkbox"/> Partially agree<br><input type="checkbox"/> Indifferent<br><input type="checkbox"/> Partially disagree<br><input type="checkbox"/> Strongly disagree |

|                                                                                                    |                                                                                                                                                                                                                          |
|----------------------------------------------------------------------------------------------------|--------------------------------------------------------------------------------------------------------------------------------------------------------------------------------------------------------------------------|
| The game was challenging                                                                           | <input type="checkbox"/> Strongly agree<br><input type="checkbox"/> Partially agree<br><input type="checkbox"/> Indifferent<br><input type="checkbox"/> Partially disagree<br><input type="checkbox"/> Strongly disagree |
| Game instructions were enough for me to understand how to play it                                  | <input type="checkbox"/> Strongly agree<br><input type="checkbox"/> Partially agree<br><input type="checkbox"/> Indifferent<br><input type="checkbox"/> Partially disagree<br><input type="checkbox"/> Strongly disagree |
| Tips given by the “mentor” during the game were useful for my learning                             | <input type="checkbox"/> Strongly agree<br><input type="checkbox"/> Partially agree<br><input type="checkbox"/> Indifferent<br><input type="checkbox"/> Partially disagree<br><input type="checkbox"/> Strongly disagree |
| Dialogue with the patients was useful for my learning                                              | <input type="checkbox"/> Strongly agree<br><input type="checkbox"/> Partially agree<br><input type="checkbox"/> Indifferent<br><input type="checkbox"/> Partially disagree<br><input type="checkbox"/> Strongly disagree |
| Quizzes were useful for my learning                                                                | <input type="checkbox"/> Strongly agree<br><input type="checkbox"/> Partially agree<br><input type="checkbox"/> Indifferent<br><input type="checkbox"/> Partially disagree<br><input type="checkbox"/> Strongly disagree |
| The possibility of prescribing insulin and see what would be the result was useful for my learning | <input type="checkbox"/> Strongly agree<br><input type="checkbox"/> Partially agree<br><input type="checkbox"/> Indifferent<br><input type="checkbox"/> Partially disagree<br><input type="checkbox"/> Strongly disagree |
| I have learned more about insulin with this game than I would learn from a lecture                 | <input type="checkbox"/> Strongly agree<br><input type="checkbox"/> Partially agree<br><input type="checkbox"/> Indifferent<br><input type="checkbox"/> Partially disagree<br><input type="checkbox"/> Strongly disagree |
| I would recommend this game for my friends                                                         | <input type="checkbox"/> Strongly agree<br><input type="checkbox"/> Partially agree<br><input type="checkbox"/> Indifferent<br><input type="checkbox"/> Partially disagree<br><input type="checkbox"/> Strongly disagree |
| Do you have any additional comments on the game?                                                   | (Free text)                                                                                                                                                                                                              |

APPENDIX 2.5

ONSITE LEARNING ACTIVITY EVALUATION SUBSCALE

| <b>Text of the question</b>                                                                | <b>Choices</b>                                                                                                                                                                                                           |
|--------------------------------------------------------------------------------------------|--------------------------------------------------------------------------------------------------------------------------------------------------------------------------------------------------------------------------|
|                                                                                            |                                                                                                                                                                                                                          |
| The activity was pleasant                                                                  | <input type="checkbox"/> Strongly agree<br><input type="checkbox"/> Partially agree<br><input type="checkbox"/> Indifferent<br><input type="checkbox"/> Partially disagree<br><input type="checkbox"/> Strongly disagree |
| The activity was fun                                                                       | <input type="checkbox"/> Strongly agree<br><input type="checkbox"/> Partially agree<br><input type="checkbox"/> Indifferent<br><input type="checkbox"/> Partially disagree<br><input type="checkbox"/> Strongly disagree |
| The activity captured my attention all the time                                            | <input type="checkbox"/> Strongly agree<br><input type="checkbox"/> Partially agree<br><input type="checkbox"/> Indifferent<br><input type="checkbox"/> Partially disagree<br><input type="checkbox"/> Strongly disagree |
| I would join other similar activities in the future                                        | <input type="checkbox"/> Strongly agree<br><input type="checkbox"/> Partially agree<br><input type="checkbox"/> Indifferent<br><input type="checkbox"/> Partially disagree<br><input type="checkbox"/> Strongly disagree |
| The way information was presented in the activity was appropriate                          | <input type="checkbox"/> Strongly agree<br><input type="checkbox"/> Partially agree<br><input type="checkbox"/> Indifferent<br><input type="checkbox"/> Partially disagree<br><input type="checkbox"/> Strongly disagree |
| Patients presented in the activity were similar with the ones I usually see in my practice | <input type="checkbox"/> Strongly agree<br><input type="checkbox"/> Partially agree<br><input type="checkbox"/> Indifferent<br><input type="checkbox"/> Partially disagree<br><input type="checkbox"/> Strongly disagree |
| The activity has approached most situations I usually see in my practice                   | <input type="checkbox"/> Strongly agree<br><input type="checkbox"/> Partially agree<br><input type="checkbox"/> Indifferent<br><input type="checkbox"/> Partially disagree<br><input type="checkbox"/> Strongly disagree |

|                                                                                          |                                                                                                                                                                                                                          |
|------------------------------------------------------------------------------------------|--------------------------------------------------------------------------------------------------------------------------------------------------------------------------------------------------------------------------|
| The activity increased my knowledge about diabetes                                       | <input type="checkbox"/> Strongly agree<br><input type="checkbox"/> Partially agree<br><input type="checkbox"/> Indifferent<br><input type="checkbox"/> Partially disagree<br><input type="checkbox"/> Strongly disagree |
| The activity has increased my security for prescribing insulin to patients with diabetes | <input type="checkbox"/> Strongly agree<br><input type="checkbox"/> Partially agree<br><input type="checkbox"/> Indifferent<br><input type="checkbox"/> Partially disagree<br><input type="checkbox"/> Strongly disagree |
| The activity will influence the way I treat patients with diabetes                       | <input type="checkbox"/> Strongly agree<br><input type="checkbox"/> Partially agree<br><input type="checkbox"/> Indifferent<br><input type="checkbox"/> Partially disagree<br><input type="checkbox"/> Strongly disagree |
| Do you have any additional comments on the activity?                                     | (Free text)                                                                                                                                                                                                              |

## APPENDIX 2.6

### IMPORTANCE FOR PROFESSIONAL PRACTICE SUBSCALE

| <b>Text of the question</b>                                                                                          | <b>Choices</b>                                                                                                                                                                                                           |
|----------------------------------------------------------------------------------------------------------------------|--------------------------------------------------------------------------------------------------------------------------------------------------------------------------------------------------------------------------|
|                                                                                                                      |                                                                                                                                                                                                                          |
| The activity had impact on my actual practice                                                                        | <input type="checkbox"/> Strongly agree<br><input type="checkbox"/> Partially agree<br><input type="checkbox"/> Indifferent<br><input type="checkbox"/> Partially disagree<br><input type="checkbox"/> Strongly disagree |
| After the activity, I felt I knew better what to do when seeing a patient with diabetes                              | <input type="checkbox"/> Strongly agree<br><input type="checkbox"/> Partially agree<br><input type="checkbox"/> Indifferent<br><input type="checkbox"/> Partially disagree<br><input type="checkbox"/> Strongly disagree |
| After the activity, I really felt more secure when seeing a patient with diabetes                                    | <input type="checkbox"/> Strongly agree<br><input type="checkbox"/> Partially agree<br><input type="checkbox"/> Indifferent<br><input type="checkbox"/> Partially disagree<br><input type="checkbox"/> Strongly disagree |
| For me, it got easier to manage treatment of patients with diabetes                                                  | <input type="checkbox"/> Strongly agree<br><input type="checkbox"/> Partially agree<br><input type="checkbox"/> Indifferent<br><input type="checkbox"/> Partially disagree<br><input type="checkbox"/> Strongly disagree |
| I was able to help my patients with diabetes to improve their control, thanks to what I have learned in the activity | <input type="checkbox"/> Strongly agree<br><input type="checkbox"/> Partially agree<br><input type="checkbox"/> Indifferent<br><input type="checkbox"/> Partially disagree<br><input type="checkbox"/> Strongly disagree |
| If you did not succeed applying what you learned into your actual practice, please tell us why:                      | (Free text)                                                                                                                                                                                                              |
| Additional comments:                                                                                                 | (Free text)                                                                                                                                                                                                              |

## APPENDIX 2.7

### QUESTIONS SENT FOR SUBJECTS WHO DID NOT FINISH THE GAME OR DID NOT ANSWER POST-GAME QUESTIONNAIRES (“INSUCCESS” SUBSCALE)

| <b>Text of the question</b>                                                                                                                         | <b>Choices</b>                                                                                            |
|-----------------------------------------------------------------------------------------------------------------------------------------------------|-----------------------------------------------------------------------------------------------------------|
|                                                                                                                                                     |                                                                                                           |
| Did you try to download and install the game?                                                                                                       | <input type="checkbox"/> Yes<br><input type="checkbox"/> No                                               |
| If you did NOT try to download and install the game, please tell us why:                                                                            | (Free text)                                                                                               |
| Did you succeed downloading and installing the game in your computer?                                                                               | <input type="checkbox"/> Yes<br><input type="checkbox"/> No                                               |
| If you did NOT succeed downloading and installing the game, please tell us why:                                                                     | (Free text)                                                                                               |
| Did you begin to play the game?                                                                                                                     | <input type="checkbox"/> Yes<br><input type="checkbox"/> No                                               |
| If you did NOT begin playing the game, please tell us why:                                                                                          | (Free text)                                                                                               |
| If you DID begin playing the game, did you play up to what patient/level?                                                                           | (Free text)                                                                                               |
| Please tell us what was the main reason you did NOT finish the game:                                                                                | (Free text)                                                                                               |
| Was there any other reasons, despite the main reason indicated above, for you having NOT finished the game? What is/were that/those reason/reasons? | (Free text)                                                                                               |
| In your oppinion, what could be improved in the game that would help you to finish it?                                                              | (Free text)                                                                                               |
| Did you find the game fun to play?                                                                                                                  | <input type="checkbox"/> Yes<br><input type="checkbox"/> No<br><input type="checkbox"/> I did not play it |
| Did you find the game potentially useful for education on insulin?                                                                                  | <input type="checkbox"/> Yes<br><input type="checkbox"/> No<br><input type="checkbox"/> I did not play it |
