# Supplementary material for: InsuOnline, an Electronic Game for Medical Education on Insulin Therapy: A Randomized Controlled Trial With Primary Care Physicians
Source: PubMed Central journal article supplement (PMC5364323; doi:10.2196/jmir.6944), 2017-03-09
Supplement: jmir_v19i3e72_app3.pdf [file jmir_v19i3e72_app3.pdf]

Diehl LA et al. InsuOnline, an electronic game for medical education on insulin therapy: a randomized controlled trial with primary care physicians.

### APPENDIX 3

#### RESULTS FROM THE “ATTITUDES” SUBSCALE

Table 4. Attitudes related to diabetes and insulin in both groups (game and control) at baseline, immediately post-intervention, and 3 months post-intervention (frequency of “strongly agree” + “partly agree” responses).

|                                                                                        | <b>Baseline</b>      | <b>Immediately post</b> | <b>3 months post<sup>a</sup></b> |
|----------------------------------------------------------------------------------------|----------------------|-------------------------|----------------------------------|
|                                                                                        | <b>Agreement (%)</b> | <b>Agreement (%)</b>    | <b>Agreement (%)</b>             |
|                                                                                        |                      |                         |                                  |
| <b>I think it is best to delay insulin initiation until it is absolutely essential</b> |                      |                         |                                  |
| Game group                                                                             | 43 (62%)             | 27 (39%) <sup>b</sup>   | 26 (40%) <sup>b</sup>            |
| Control group                                                                          | 47 (72%)             | 28 (43%) <sup>b</sup>   | 28 (48%)                         |
|                                                                                        |                      |                         |                                  |
| <b>I think insulin therapy should be initiated by an endocrinologist</b>               |                      |                         |                                  |
| Game group                                                                             | 9 (13%)              | 3 (4%)                  | 1 (2%) <sup>b</sup>              |
| Control group                                                                          | 13 (20%)             | 2 (3%) <sup>b</sup>     | 4 (7%)                           |
|                                                                                        |                      |                         |                                  |
| <b>I think insulin therapy should be initiated in hospital</b>                         |                      |                         |                                  |
| Game group                                                                             | 3 (4%)               | 1 (1%)                  | 1 (1%)                           |
| Control group                                                                          | 4 (6%)               | 3 (5%)                  | 5 (9%)                           |
|                                                                                        |                      |                         |                                  |

|                                                                                                         |          |                       |                       |
|---------------------------------------------------------------------------------------------------------|----------|-----------------------|-----------------------|
| <b>I think family physicians would prescribe insulin more often if it were not injectable</b>           |          |                       |                       |
| Game group                                                                                              | 43 (62%) | 43 (62%)              | 45 (69%)              |
| Control group                                                                                           | 38 (58%) | 35 (54%)              | 47 (81%) <sup>c</sup> |
|                                                                                                         |          |                       |                       |
| <b>I think insulin initiation is one of the most difficult aspects of treating patients with DM</b>     |          |                       |                       |
| Game group                                                                                              | 56 (81%) | 46 (67%)              | 53 (82%)              |
| Control group                                                                                           | 48 (74%) | 50 (77%)              | 48 (83%)              |
|                                                                                                         |          |                       |                       |
| <b>I think most patients with type 2 DM will eventually need insulin, regardless of their adherence</b> |          |                       |                       |
| Game group                                                                                              | 36 (52%) | 65 (94%) <sup>b</sup> | 57 (88%) <sup>b</sup> |
| Control group                                                                                           | 32 (49%) | 55 (85%) <sup>b</sup> | 46 (80%) <sup>b</sup> |
|                                                                                                         |          |                       |                       |
| <b>I think that, for most patients, benefits of insulin are greater than the risks</b>                  |          |                       |                       |
| Game group                                                                                              | 60 (87%) | 68 (99%)              | 62 (96%)              |
| Control group                                                                                           | 55 (85%) | 64 (99%)              | 56 (97%)              |
|                                                                                                         |          |                       |                       |
| <b>I think most patients would benefit from</b>                                                         |          |                       |                       |

|                                                                                       |          |                          |          |
|---------------------------------------------------------------------------------------|----------|--------------------------|----------|
| <b>insulin before developing diabetes complications</b>                               |          |                          |          |
| Game group                                                                            | 64 (93%) | 67 (97%)                 | 61 (94%) |
| Control group                                                                         | 59 (91%) | 63 (97%)                 | 56 (97%) |
|                                                                                       |          |                          |          |
| <b>I think that, for most patients, training for using insulin is not complicated</b> |          |                          |          |
| Game group                                                                            | 31 (45%) | 54 (78%) <sup>b, d</sup> | 45 (69%) |
| Control group                                                                         | 30 (46%) | 34 (52%)                 | 30 (52%) |

<sup>a</sup> 4 subjects from game group and 7 from control group did not answer the 3-month post-intervention questionnaire.

<sup>b</sup>  $P < .05$  compared to baseline (pairwise chi-squared test with Bonferroni correction).

<sup>c</sup>  $P < .05$  compared to immediately post-test (pairwise chi-squared test with Bonferroni correction).

<sup>d</sup>  $P < .05$  compared to control group at the same point (chi-squared test).
